# Supplementary material for: Mitochondria targeting two-photon fluorescent molecules for gene transfection and biological tracking
Source: Royal Society of Chemistry journal article supplement (doi:10.1039/c9tb00662a), 2019-01-01
Supplement: c9tb00662a1.pdf [file c9tb00662a1.pdf]

## Supporting Information

### **Mitochondria targeting two-photon fluorescent molecules for gene transfection and biological tracking**

Wan Sun,<sup>a</sup> Xu-Ying Liu,<sup>a</sup> Jing-Xue Cui,<sup>a</sup> Le-Le Ma,<sup>a</sup> Yuan Zhang<sup>b</sup>, Zhong-Lin Lu,<sup>a\*</sup>  
Lan He<sup>b\*</sup>

<sup>a</sup> Key Laboratory of Theoretical and Computational Photochemistry, Ministry of Education, College of Chemistry, Beijing Normal University, Beijing 100875, China.

<sup>b</sup> National Institute for Food and Drug Control, Beijing, 100050, China

\*Corresponding authors: luzl@bnu.edu.cn (Zhong-Lin Lu), helan1961@aliyun.com  
(Lan He)

## **Contents**

- 1. Syntheses**
- 2. UV-vis Spectra of 1, 2, 3**
- 3. Fluorescence lifetime of 1, 2, 3**
- 4. Two photon absorption cross-section values of 1, 2, 3**
- 5. Water solubility of 1, 2, 3**
- 6. Photo-stability and pH-stability of 1, 2, 3**
- 7. Cytotoxicity of 1, 2, 3**
- 8. Laser confocal imaging of compounds 1, 2 and 3**
- 9. RFP expression of 1/CPPs; 2/CPPs; 3/CPPs, CPPs**
- 10. Transfection efficiencies of pGL-3 DNA by 1/CPPs, 2/CPPs, 3/CPPs**
- 11. Photo-physical properties**
- 12. Spectra data of compounds synthesized**
- 13. References**

## 1. Syntheses

### Synthesis of **1**

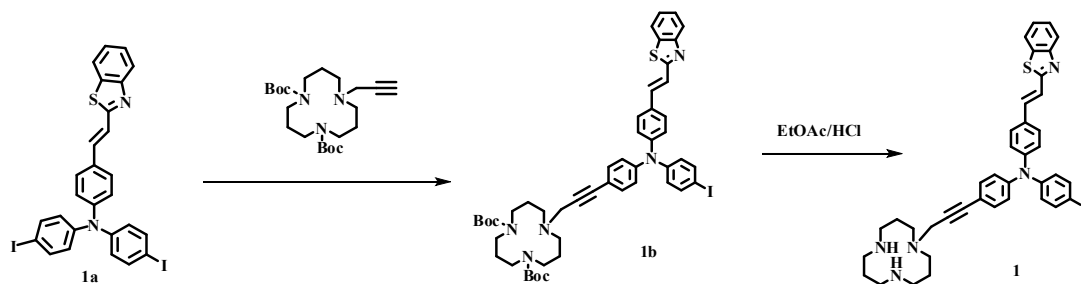

(*E*)-4-(2-(Benzo[d]thiazol-2-yl)vinyl)-*N,N*-bis(4-iodophenyl)aniline (**1a**) (0.3 g, 0.51 mmol), Pd(PPh<sub>3</sub>)<sub>4</sub> (58mg, 0.05mmol), CuI (10mg, 0.05mmol), and propargyl-[12]aneN<sub>3</sub> (0.83 g, 2.0 mmol) <sup>1</sup> (4 equiv.) in triethylamine (15 mL) were added via a syringe under inert gas to a round-bottomed flask and the reaction mixture was stirred at 50 °C for 48 h. After removing the solvent under vacuum, the crude liquid product was then purified by flash column chromatography, eluting with petroleum ether and ethyl acetate to give yellow crystals (0.10 g, yield 21%). <sup>1</sup>H NMR (400 MHz, CDCl<sub>3</sub>) δ 7.97 (d, *J* = 8.0 Hz, 1H), 7.84 (d, *J* = 7.7 Hz, 1H), 7.56 (d, *J* = 8.3 Hz, 2H), 7.48 – 7.41 (m, 4H), 7.32 (t, *J* = 11.4 Hz, 4H), 7.03 (dd, *J* = 17.8, 8.3 Hz, 4H), 6.86 (d, *J* = 8.3 Hz, 2H), 3.57 (s, 2H), 3.31 (d, *J* = 8.7 Hz, 8H), 2.58 (s, 4H), 1.82 (d, *J* = 8.0 Hz, 6H), 1.45 (s, 18H). <sup>13</sup>C NMR (101 MHz, ) δ 167.25, 156.40, 154.00, 147.95, 146.62, 146.40, 138.59, 136.91, 134.36, 133.04, 130.77, 130.23, 128.66, 126.80, 126.64, 126.40, 126.22, 125.50, 125.32, 124.20, 123.98, 123.65, 123.17, 122.90, 121.56, 120.78, 118.31, 87.10, 85.18, 83.84, 79.32, 50.28, 46.11, 44.27, 40.74, 28.61, 26.99, 26.88, 26.10. HRMS-ESI: *m/z* calcd. [M+H]<sup>+</sup> for C<sub>49</sub>H<sub>58</sub>IN<sub>5</sub>O<sub>4</sub>S<sup>+</sup>, 938.3176; found, 938.3182.

Compound **1b** (0.22 g, 0.23 mmol) was added to a saturated hydrogen chloride solution of ethyl acetate (5 mL) and the mixture was stirred for 5 h at room temperature. The resulting suspension was filtrated and the solid was washed with ethyl acetate, then dried in vacuum at 60 °C for 24 h. A red solid as compound **1** was obtained in 0.15 g (86%). <sup>1</sup>H NMR (400 MHz, ) δ 8.08 (d, *J* = 6.0 Hz, 1H), 7.96 (d, *J* = 6.2 Hz, 1H), 7.67 (dd, *J* = 26.3, 17.0 Hz, 6H), 7.47 (d, *J* = 43.0 Hz, 4H), 7.03 (s, 4H), 6.90 (s, 2H), 3.74 – 3.53 (m, 2H), 3.171 – 2.68 (m, 12H), 2.08 – 1.85(m, 6H). <sup>13</sup>C NMR (126 MHz, DMSO-*d*<sub>6</sub>): δ 167.35, 153.96, 147.68, 146.40, 139.04, 138.97, 137.26, 134.62, 133.63, 129.71, 128.57, 127.43, 127.02, 125.85, 124.03, 122.85, 122.66, 121.01,

88.77, 49.66, 47.52, 21.58, 19.39, 18.22. HRMS-ESI:  $m/z$  calcd.  $[M+H]^+$  for  $C_{39}H_{41}IN_5S^+$ , 738.2127; found, 738.2138.

### Synthesis of **2**

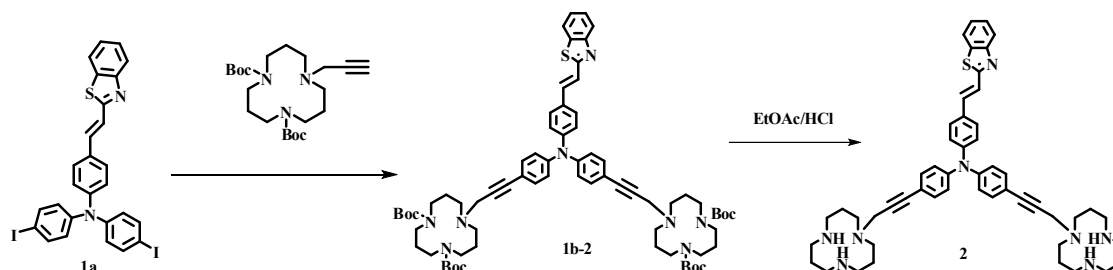

According to the same procedure, 0.16g of **1b-2** was obtained, yield: 30%.  $^1H$  NMR (400 MHz,  $CDCl_3$ )  $\delta$  7.98 (d,  $J = 8.2$  Hz, 1H), 7.86 (d,  $J = 7.8$  Hz, 1H), 7.52 – 7.42 (m, 4H), 7.40 – 7.28 (m, 6H), 7.07 (d,  $J = 8.4$  Hz, 2H), 7.03 (d,  $J = 8.4$  Hz, 4H), 3.59 (s, 4H), 3.42 – 3.18 (m, 16H), 2.59 (s, 8H), 1.95 – 1.72 (m, 12H), 1.44 (d,  $J = 14.8$  Hz, 36H).  $^{13}C$  NMR (126 MHz,  $CDCl_3$ ):  $\delta$  167.23, 156.34, 153.91, 147.93, 146.38, 136.90, 134.28, 132.94, 130.93, 130.64, 130.14, 128.86, 128.57, 126.33, 125.43, 125.24, 124.27, 123.74, 122.81, 121.49, 120.66, 118.21, 85.15, 83.71, 79.26, 71.80, 50.17, 46.03, 44.19, 40.64, 29.71, 28.54, 28.50, 27.73, 26.82, 26.00, 19.18. HRMS-ESI:  $m/z$  calcd.  $[M+H]^+$  for  $C_{71}H_{95}N_8O_8S^+$ , 1219.6994; found, 1219.6978.

Compound **1b-2** (0.20 g 0.17 mmol) was added to a saturated hydrogen chloride solution of ethyl acetate (5 mL) and the mixture was stirred for 5 h at room temperature. The resulting suspension was filtrated and the solid was washed with ethyl acetate, dried in vacuum at 60 °C for 24 h. A red solid as compound **2** was obtained in 0.13 g (90%).  $^1H$  NMR (400 MHz,  $DMSO-d_6$ )  $\delta$  8.09 (d,  $J = 7.4$  Hz, 1H), 7.96 (d,  $J = 8.1$  Hz, 1H), 7.76 (s, 2H), 7.64 (d,  $J = 16.5$  Hz, 2H), 7.53 (d,  $J = 14.9$  Hz, 2H), 7.42 (d,  $J = 6.7$  Hz, 4H), 7.05 (s, 6H), 3.74 (s, 4H), 3.50 (s, 4H), 3.32 – 3.04 (m, 15H), 2.90 (s, 5H), 2.22 (s, 2H), 2.07 (s, 5H), 1.85 (s, 5H).  $^{13}C$  NMR (126 MHz,  $DMSO-d_6$ ):  $\delta$  167.10, 153.92, 147.99, 147.57, 137.93, 137.22, 134.42, 133.63, 132.56, 132.00, 131.04, 129.74, 129.32, 128.63, 127.03, 125.87, 124.48, 122.87, 122.66, 121.14, 60.26, 53.90, 49.78, 47.49, 43.02, 41.34, 40.98, 31.79, 28.43, 21.58, 21.29, 20.60, 19.66, 19.40, 18.21, 14.60. HRMS-ESI:  $m/z$  calcd.  $[M+H]^+$  for  $C_{51}H_{63}N_8S^+$ , 819.4896; found, 819.4897.

### Synthesis of **3**

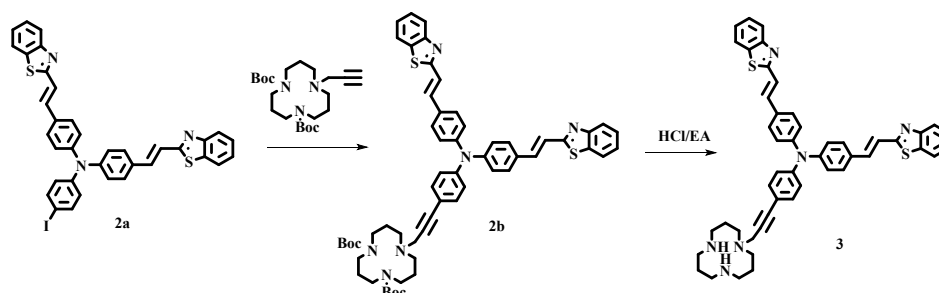

According to the similar procedure, 0.04 g (0.058 mmol) of **2a** resulted in 0.19 g of the compound **2b** as yellow crystals (58%).  $^1\text{H}$  NMR (400 MHz,  $\text{CDCl}_3$ )  $\delta$  7.98 (d,  $J = 8.0$  Hz, 2H), 7.86 (d,  $J = 7.8$  Hz, 2H), 7.53 – 7.44 (m, 8H), 7.35 (d,  $J = 7.9$  Hz, 6H), 7.12 (d,  $J = 8.4$  Hz, 4H), 7.07 (d,  $J = 8.3$  Hz, 1H), 3.59 (s, 2H), 3.33 (d,  $J = 7.2$  Hz, 8H), 2.60 (s, 4H), 1.85 (d,  $J = 5.6$  Hz, 7H), 1.47 (s, 18H).  $^{13}\text{C}$  NMR (126 MHz,  $\text{CDCl}_3$ ):  $\delta$  167.68, 167.19, 156.35, 153.93, 147.82, 146.31, 136.86, 134.31, 133.03, 132.41, 131.35, 130.91, 130.50, 128.86, 128.76, 128.64, 126.34, 125.27, 124.63, 124.16, 122.84, 121.49, 120.85, 118.57, 85.16, 83.88, 79.28, 71.80, 68.47, 50.22, 46.07, 44.26, 40.75, 31.93, 29.70, 29.66, 29.37, 28.55, 28.47, 27.74, 26.88, 26.04, 22.70, 22.19, 19.17, 14.12. HRMS-ESI:  $m/z$  calcd.  $[\text{M}+\text{H}]^+$  for  $\text{C}_{58}\text{H}_{63}\text{N}_6\text{O}_4\text{S}_2^+$ , 971.4352; found, 971.4344.

Compound **2b** (0.073 g 0.075 mmol) was added to a saturated hydrogen chloride solution of ethyl acetate (5 mL) and the mixture was stirred for 3 h at room temperature. The resulting suspension was filtrated and the solid was washed with ethyl acetate, dried in vacuum at 60 °C for 24 h. A red solid as compound **3** was obtained in 0.05 g (86%).  $^1\text{H}$  NMR (400 MHz,  $\text{DMSO-}d_6$ )  $\delta$  8.09 (d,  $J = 7.7$  Hz, 2H), 7.96 (d,  $J = 7.9$  Hz, 2H), 7.77 (d,  $J = 8.3$  Hz, 4H), 7.67 (s, 2H), 7.63 (s, 1H), 7.53 (dd,  $J = 15.9, 9.0$  Hz, 4H), 7.47 – 7.39 (m, 3H), 7.11 (dt,  $J = 13.9, 7.4$  Hz, 6H), 3.75 (s, 2H), 3.12 (dd,  $J = 88.1, 56.7$  Hz, 12H), 1.97 (d,  $J = 84.1$  Hz, 6H).  $^{13}\text{C}$  NMR (126 MHz,  $\text{DMSO-}d_6$ ):  $\delta$  167.10, 153.96, 147.63, 146.68, 137.23, 134.43, 133.54, 132.06, 130.94, 129.72, 129.17, 128.60, 127.00, 125.83, 124.66, 124.52, 124.40, 122.94, 122.88, 122.63, 121.07, 71.62, 49.81, 47.51, 43.02, 41.32, 29.49, 27.68, 21.60, 19.58, 19.36, 18.22. HRMS-ESI:  $m/z$  calcd.  $[\text{M}+\text{H}]^+$  for  $\text{C}_{48}\text{H}_{47}\text{N}_6\text{S}_2^+$ , 771.3304; found, 771.3304.

## 2. UV-vis Spectra of 1, 2, 3

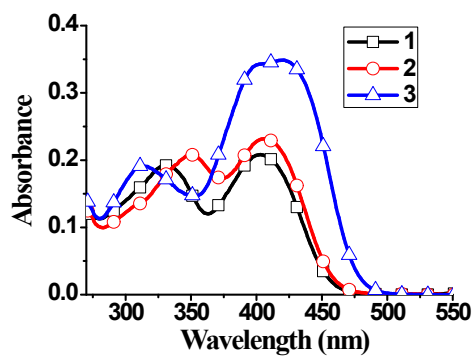

Fig. S1 Linear absorption of 1, 2, 3 in DMF ( $c = 1.0 \times 10^{-5}$  M)

## 3. Fluorescence lifetime of 1, 2, 3

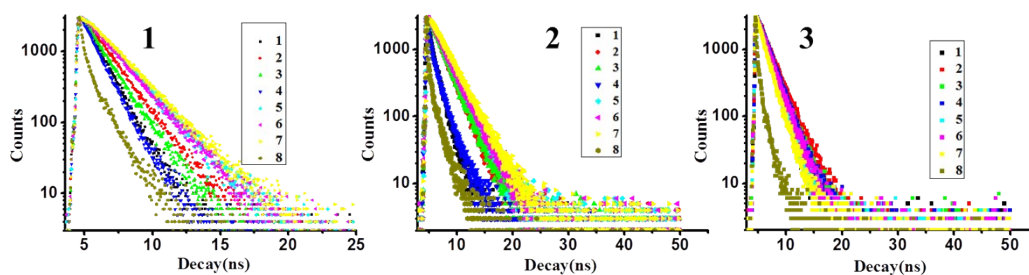

Fig. S2 Fluorescence lifetime of 1, 2, 3 in eight solvents (Ben, DCM, THF, EtOAc, MeCN, DMSO, DMF, H<sub>2</sub>O)

## 4. Two photon absorption cross-section values of 1, 2, 3

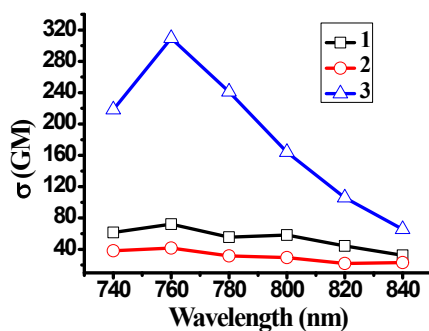

Fig. S3 Two photon absorption cross-section values of 1, 2, 3 in 100  $\mu$ M DMSO (100  $\mu$ M, Ex = 760 nm).

## 5. Water solubility of 1, 2, 3

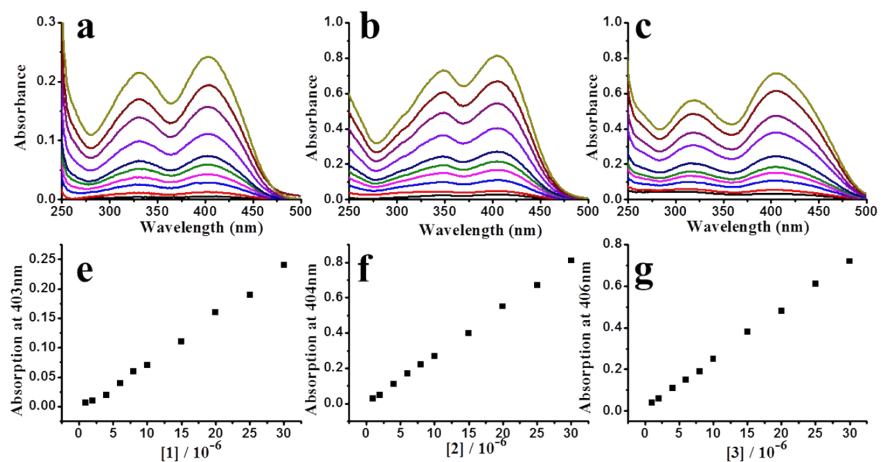

**Fig. S4** Absorption spectra and plot of intensity against the concentration of **1** (a, e), **2** (b, f) and **3** (c, g) in PBS buffer (pH = 7.4), respectively.  $c = 10 \mu\text{M}$ ,  $25^\circ\text{C}$ .

## 6. Photo-stability and pH- stability of 1, 2, 3

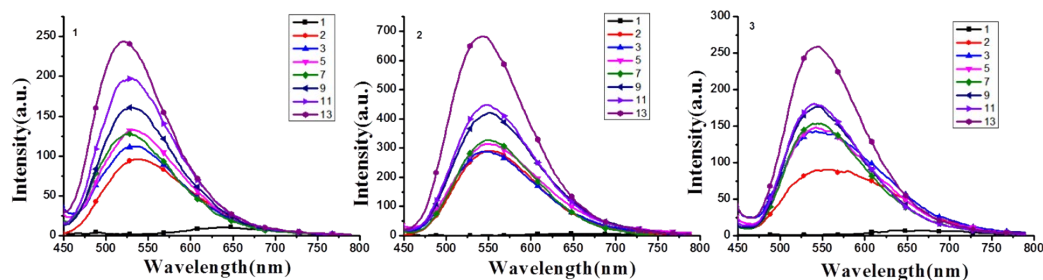

**Fig. S5** The fluorescent intensities for **1**, **2**, **3** at varied pH values in aqueous

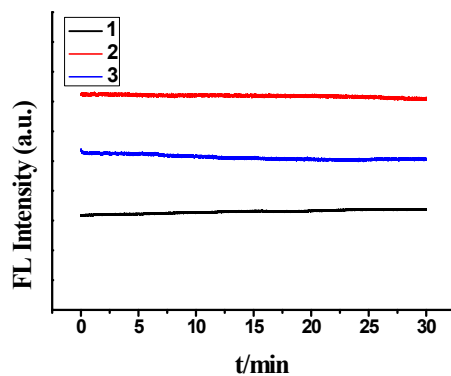

**Fig. S6** Photo-stability of **1**, **2**, **3** in PBS (pH=7.2),  $c = 10 \mu\text{M}$ ,  $25^\circ\text{C}$

## 7. Cytotoxicity of 1, 2, 3

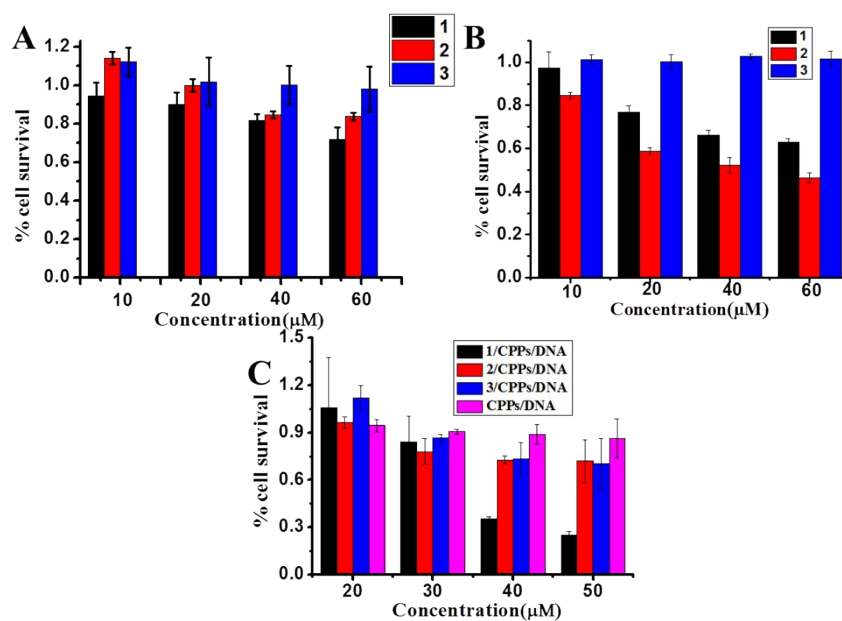

**Fig. S7** Cytotoxicity data results of (A) 1-3 in HeLa, (B) 1-3 in A549, (C) 1-3/CPPs/DNA in HeLa obtained from the MTT assay (The data are given as mean  $\pm$  SD ( $n = 6$ ))

## 8. Laser confocal imaging of compounds 1, 2 and 3

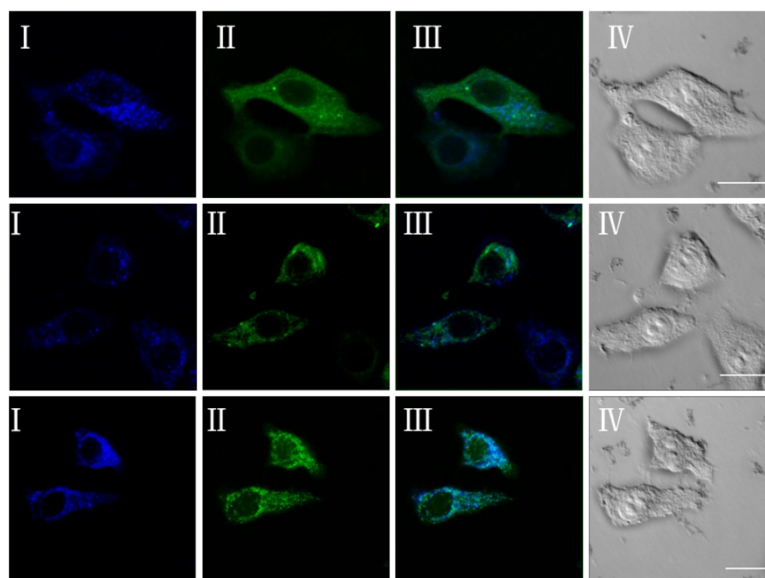

**Fig. S8** Colocalization imaging of HeLa cells stained with Lyso Tracked Blue (I,  $\lambda_{\text{ex}} = 405$  nm,  $\lambda_{\text{em}} = 425\text{--}475$  nm) and with 1-3 (II,  $\lambda_{\text{ex}} = 488$  nm,  $\lambda_{\text{em}} = 530\text{--}560$  nm) after 30 min of incubation, (III) Merged image of (I) and (II); (IV) DIC image of HeLa cells. Scale bars = 20  $\mu\text{m}$ .



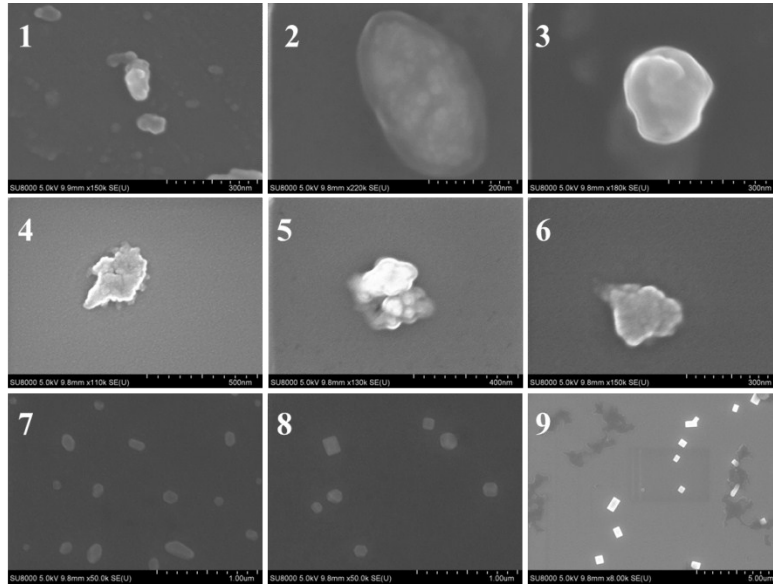

**Fig. S9** SEM images of (1, 2, 3)compound 1-3; (4, 5, 6) complex 1-3/CPPs; (7, 8, 9) condensed DNA 1-3/CPPs in Tris-HCl buffer (5 mM, pH 7.4): (a) [1]= 10  $\mu$ M; [2]= 10  $\mu$ M; [3]= 10  $\mu$ M, [DNA]= 5 $\mu$ M.

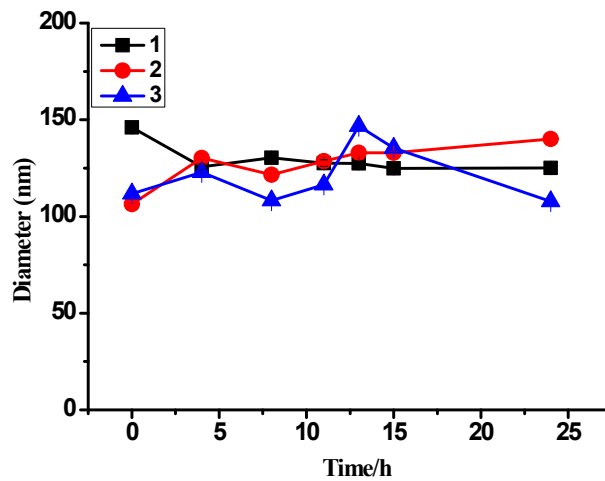

**Fig. S10** The stability of 1-3/CPPs/DNA nanoparticles in DMEM containing 10% FBS during an incubation time over 24 h. [1-3/CPPs] = 10  $\mu$ M, [DNA] = 5  $\mu$ M.

## 9. RFP expression of 1/CPPs; 2/CPPs; 3/CPPs, CPPs

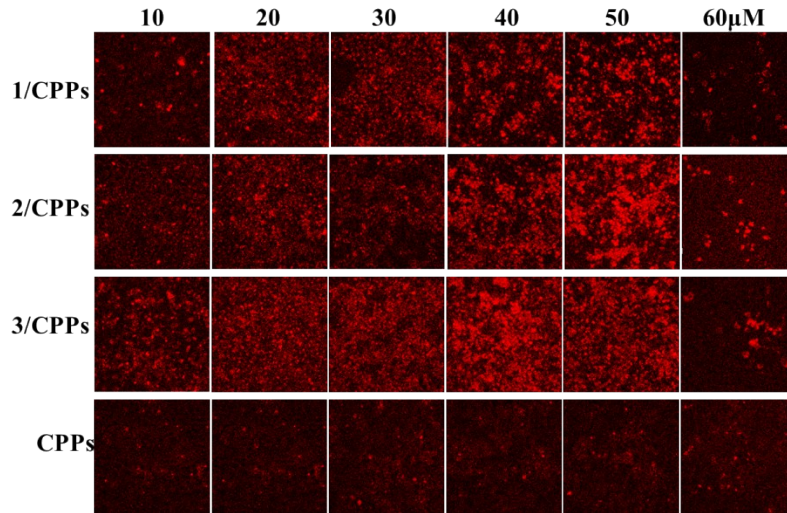

**Fig. S11** Confocal microscopy images of RFP expression of 1/CPPs; 2/CPPs; 3/CPPs, CPPs with different concentration (10 - 60 $\mu$ M) in HeLa cells. [RFP DNA]= 10 $\mu$ g/mL

### 10. Transfection efficiencies of pGL-3 DNA by 1/CPPs, 2/CPPs, 3/CPPs

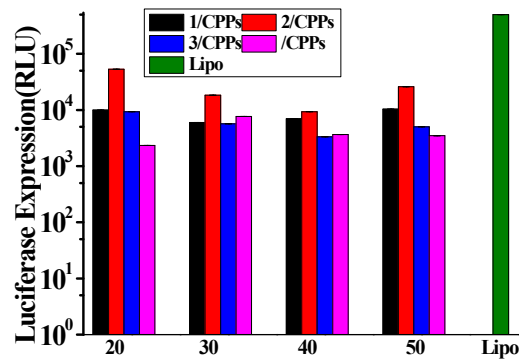

**Fig. S12** Transfection efficiencies of pGL-3 DNA by 1/CPPs, 2/CPPs, 3/CPPs at varied concentrations in HeLa cells by luciferase assays. The [pGL-3 DNA] = 10  $\mu$ g/mL. As controls, CPPs and Lipofectamine 2000 were also investigated.

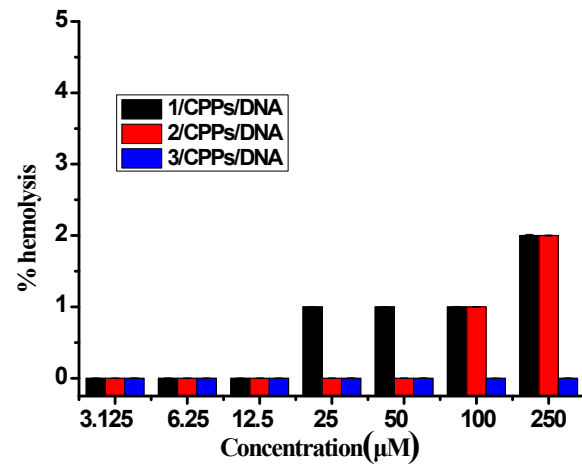

Fig. S13 Hemolytic activity of the 1-3/CPPs/DNA

## 11. Photo-physical properties

**Table S1** Single-photon-related photophysical properties of **1**, **2**, **3**

| Compound | solvent          | $\lambda_{\text{abs}}$ | $\epsilon / 10^4$ | $\lambda_{\text{em}}$ | $\Phi/\%$ | $\tau/\text{ns}$ |
|----------|------------------|------------------------|-------------------|-----------------------|-----------|------------------|
| <b>1</b> | <b>BBenn</b>     | 335 405                | 1.2 1.3           | 493                   | 36.8      | 1.21             |
|          | DCM              | 334 400                | 1.8 1.6           | 509                   | 46.5      | 1.68             |
|          | THF              | 330 401                | 2.4 2.5           | 499                   | 50.2      | 1.47             |
|          | EtOAc            | 329 400                | 1.5 1.6           | 498                   | 32.9      | 1.15             |
|          | MeCN             | 327 397                | 1.8 1.8           | 535                   | 44.7      | 2.08             |
|          | DMF              | 330 402                | 1.9 2.1           | 535                   | 40.6      | 2.02             |
|          | DMSO             | 330 407                | 2.0 2.0           | 542                   | 37.9      | 2.23             |
|          | H <sub>2</sub> O | 332 404                | 1.4 1.4           | 524                   | 20.9      | 0.79             |
| <b>2</b> | <b>BBenn</b>     | 359 415                | 1.1 1.5           | 491                   | 26.3      | 1.18             |
|          | DCM              | 356 401                | 1.8 1.9           | 516                   | 69        | 2.16             |
|          | THF              | 352 407                | 2.1 2.1           | 509                   | 36.3      | 2.20             |
|          | EtOAc            | 353 405                | 1.8 1.9           | 503                   | 26.8      | 1.37             |
|          | MeCN             | 348 399                | 1.9 2.0           | 539                   | 74.5      | 2.60             |
|          | DMF              | 348 405                | 2.1 2.3           | 539                   | 64.0      | 2.52             |
|          | DMSO             | 349 409                | 2.1 2.3           | 545                   | 76.7      | 2.80             |
|          | H <sub>2</sub> O | 349 407                | 1.7 1.9           | 646                   | 30.4      | 0.84             |
| <b>3</b> | <b>BBenn</b>     | 313 424                | 1.6 3.1           | 493                   | 38.1      | 1.63             |
|          | DCM              | 313 423                | 1.9 3.3           | 521                   | 33.9      | 2.12             |
|          | THF              | 310 420                | 1.7 3.0           | 505                   | 41.4      | 1.90             |
|          | EtOAc            | 310 418                | 1.7 3.0           | 503                   | 34.0      | 1.88             |
|          | MeCN             | 310 416                | 1.7 3.0           | 547                   | 15.4      | 1.65             |
|          | DMF              | 313 422                | 1.7 3.1           | 547                   | 17.0      | 1.83             |
|          | DMSO             | 314 423                | 2.0 3.3           | 551                   | 14.1      | 1.50             |
|          | H <sub>2</sub> O | 313 414                | 1.5 2.1           | 547                   | —         | 0.65             |

## 12. Spectra data of compounds synthesized

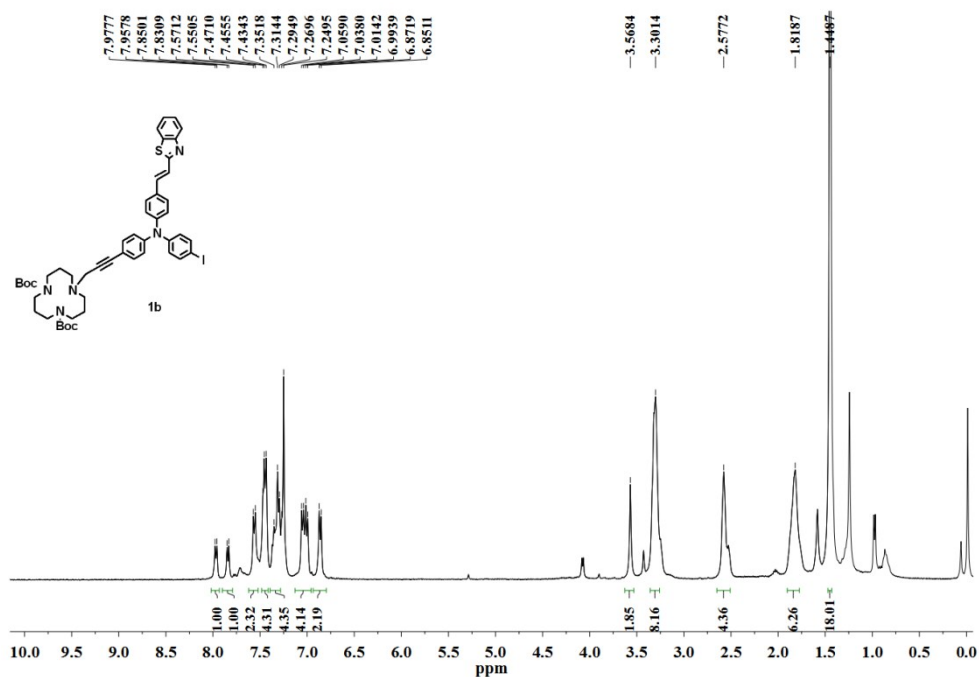

Fig. S14  $^1\text{H}$  NMR (400 MHz,  $\text{CDCl}_3$ ) spectrum of **1b**

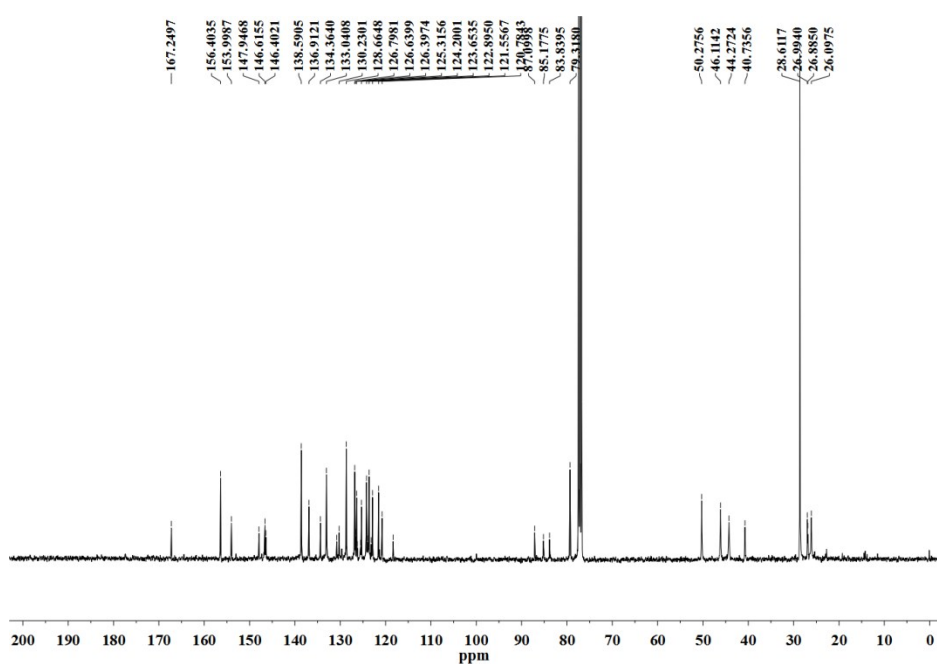

Fig. S15  $^{13}\text{C}$  NMR (101 MHz,  $\text{CDCl}_3$ ) spectrum of **1b**

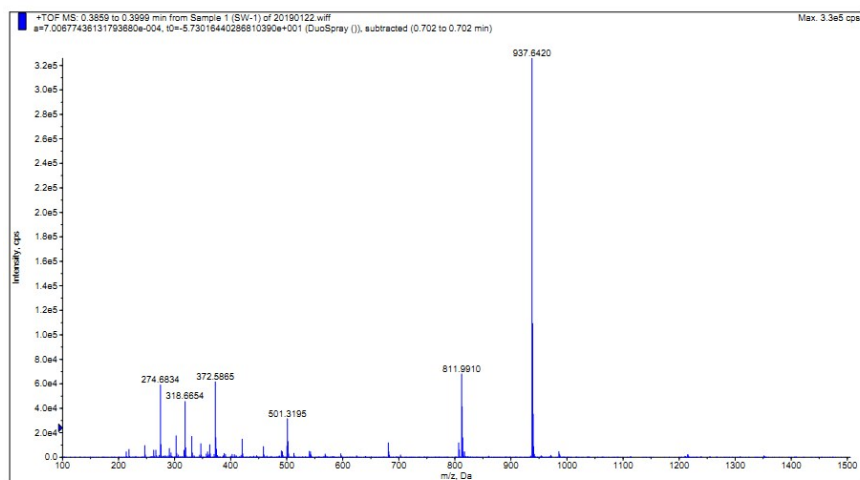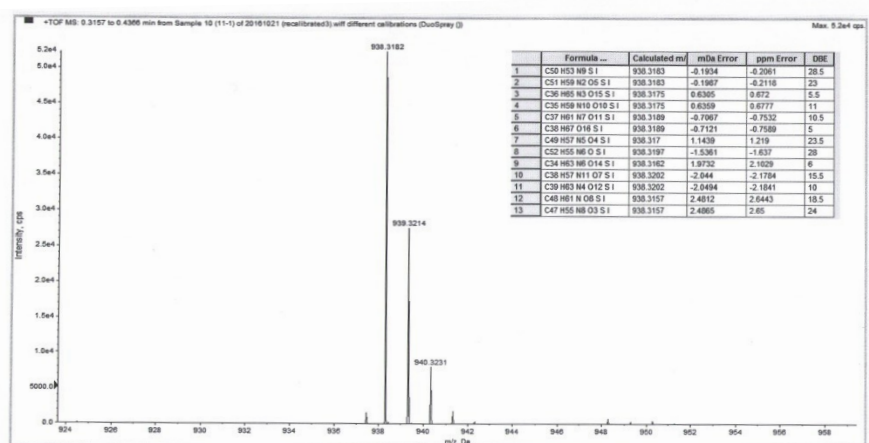

Fig. S16 The MS and HRMS-ESI spectrum of 1b

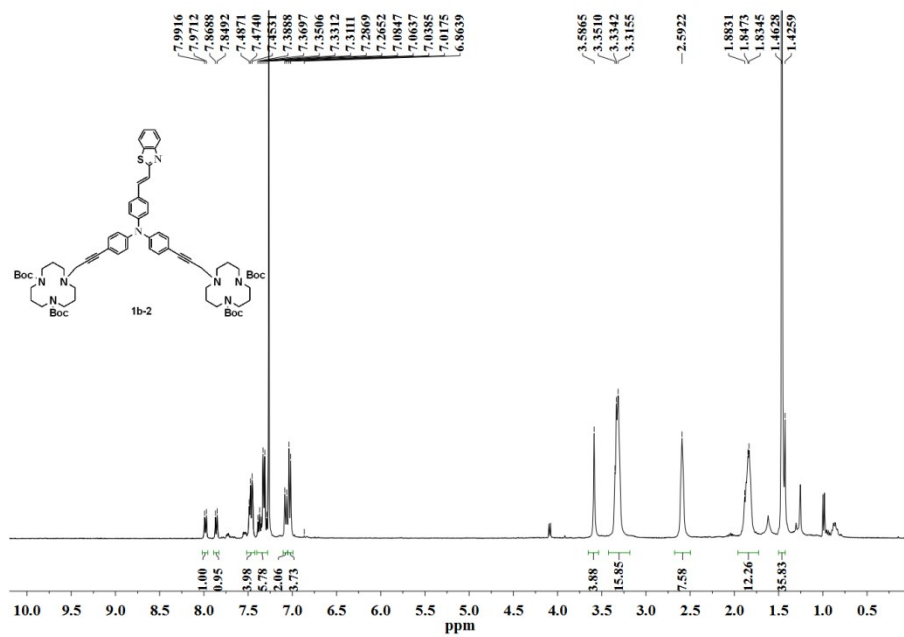

**Fig. S17**  $^1\text{H}$  NMR (400 MHz,  $\text{CDCl}_3$ ) spectrum of **1b-2**

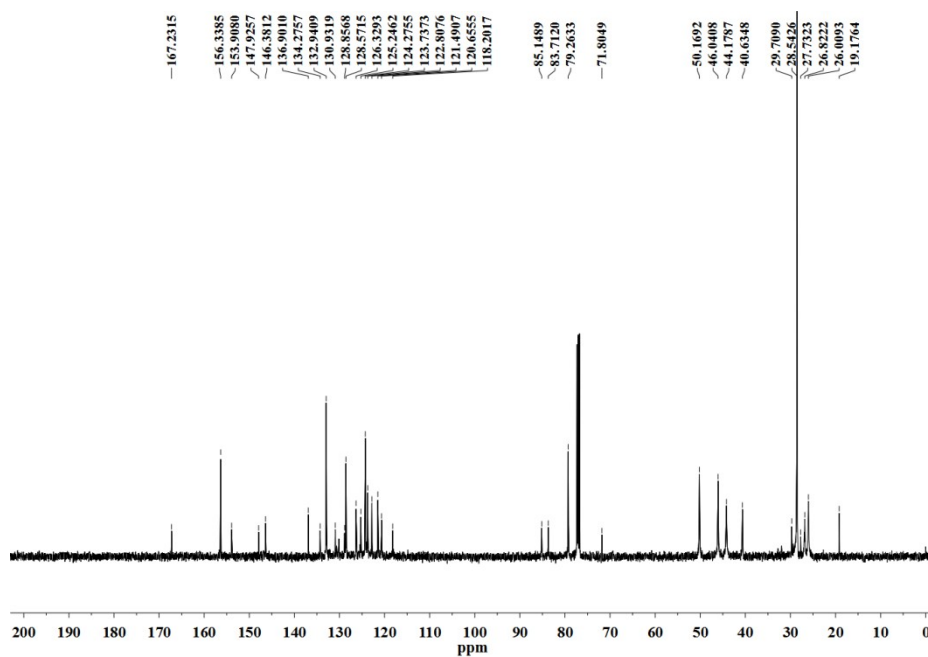

**Fig. S18**  $^{13}\text{C}$  NMR (126 MHz,  $\text{CDCl}_3$ ) spectrum of **1b-2**

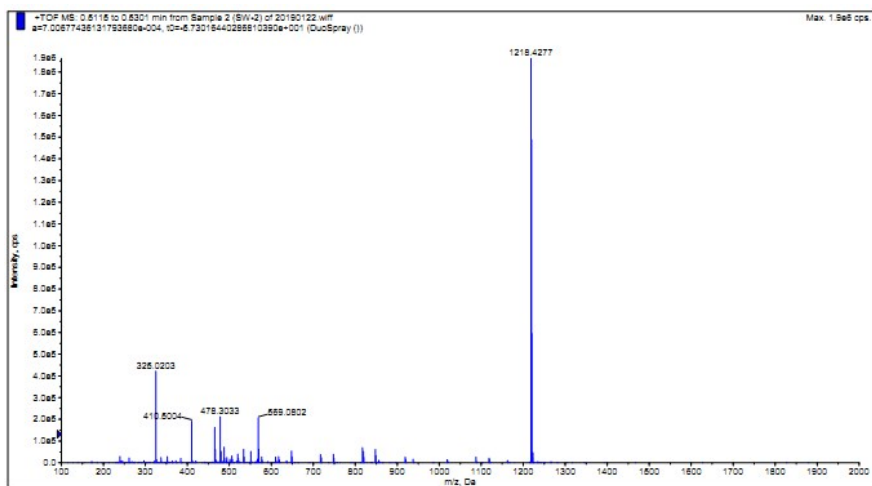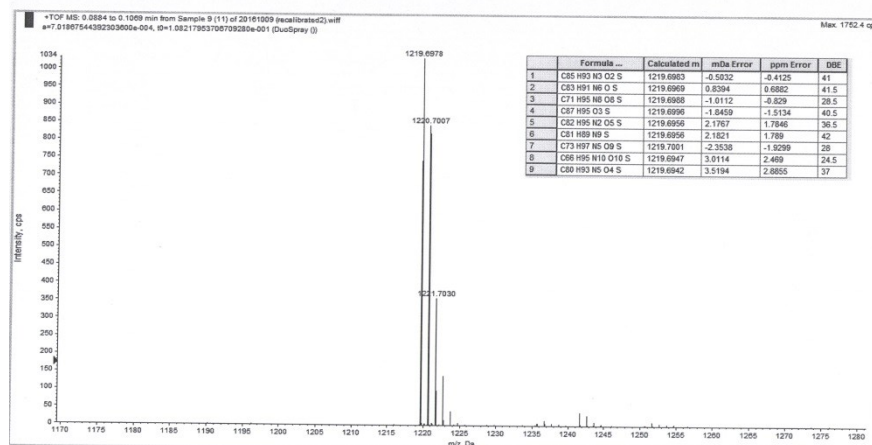

Fig. S19 The MS and HRMS-ESI spectrum of **1b-2**



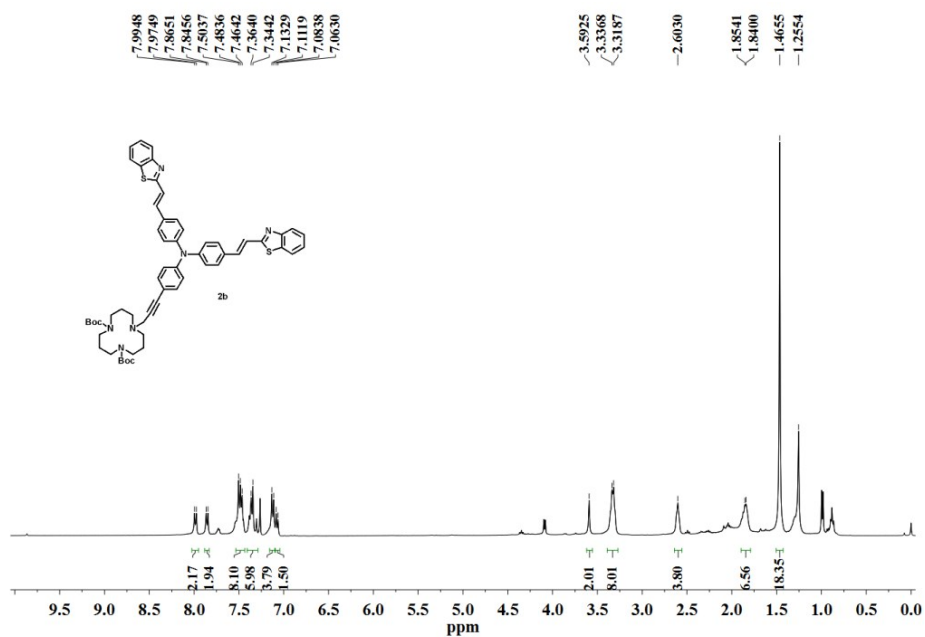

Fig. S20 <sup>1</sup>H NMR (400 MHz, CDCl<sub>3</sub>) spectrum of **2b**

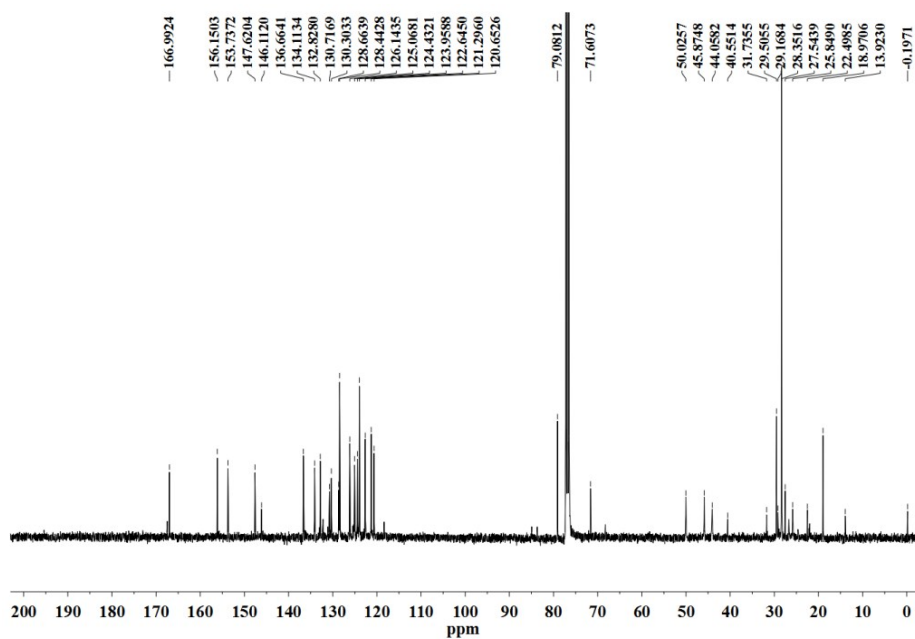

Fig. S21 <sup>13</sup>C NMR (126 MHz, CDCl<sub>3</sub>) spectrum of **2b**

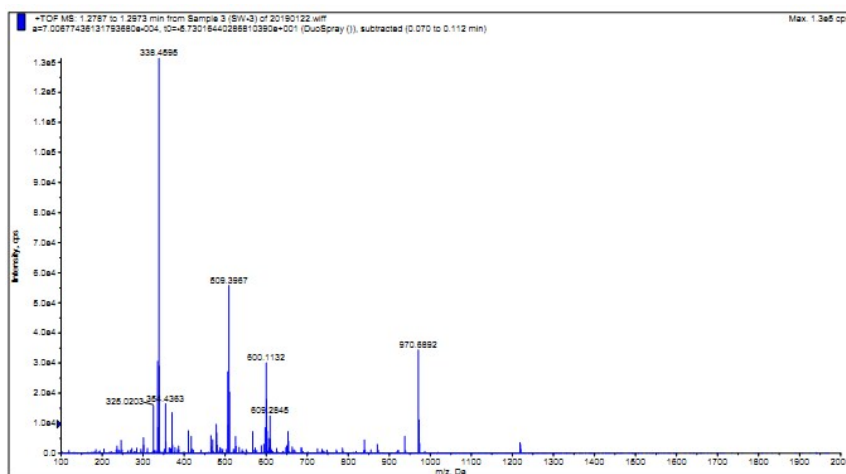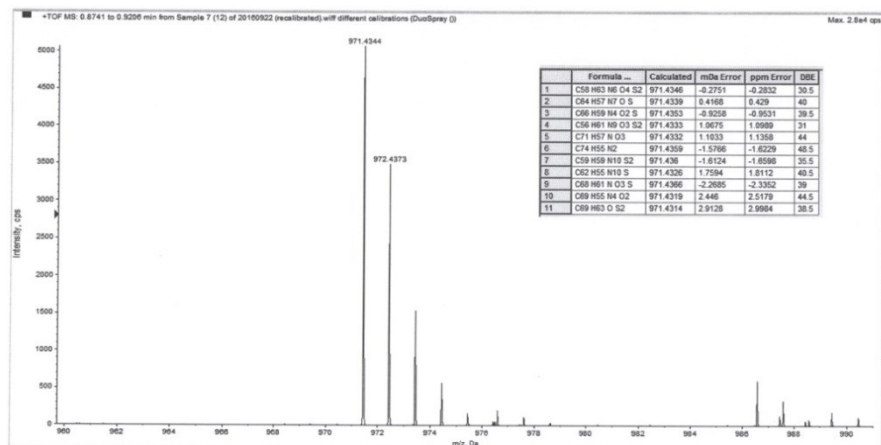

Fig. S22 The MS and HRMS-ESI spectrum of **2b**

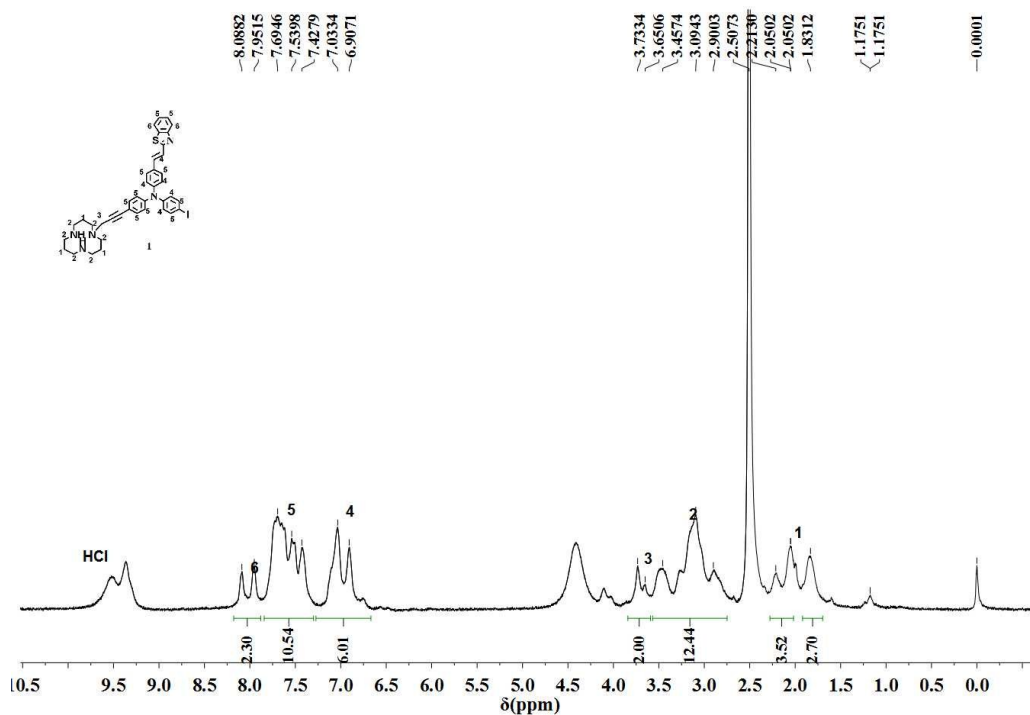

Fig. S23 <sup>1</sup>H NMR (400 MHz, DMSO-*d*<sub>6</sub>) spectrum of 1

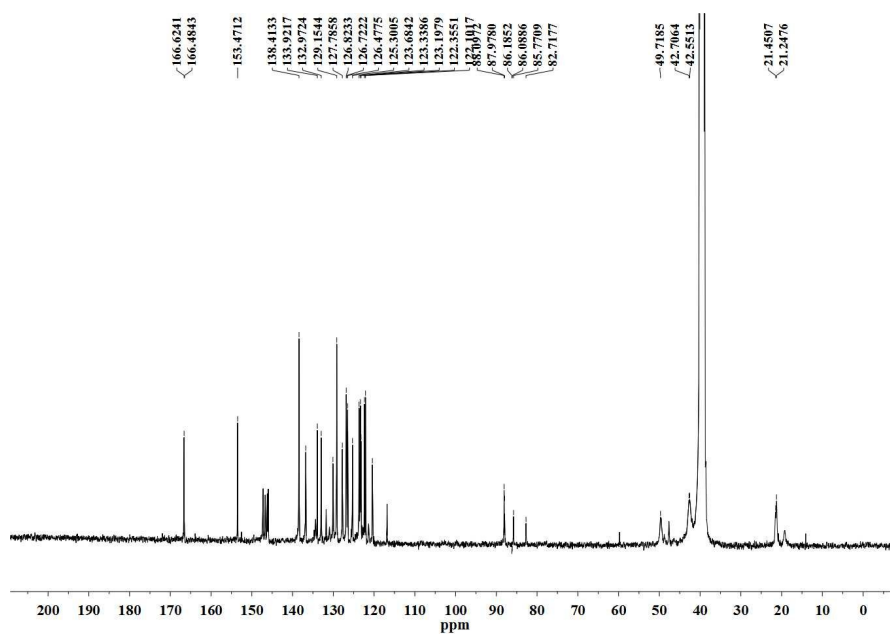

Fig. S24 <sup>13</sup>C NMR (126 MHz, DMSO-*d*<sub>6</sub>) spectrum of 1

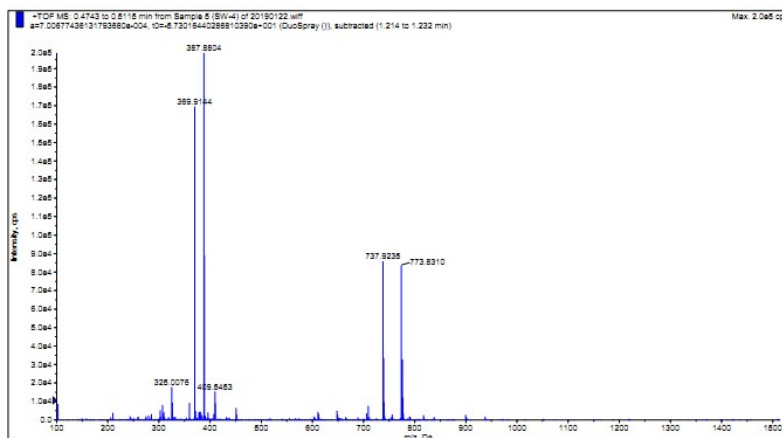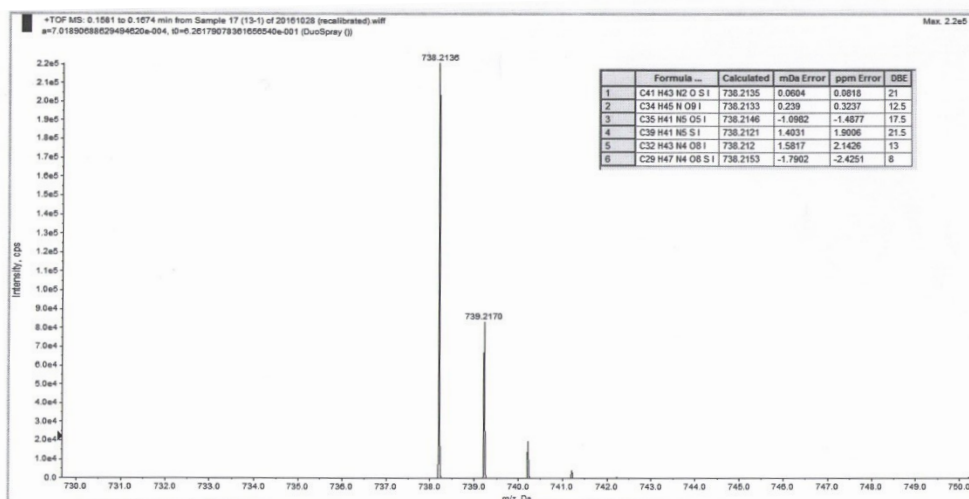

Fig. S25 The MS and HRMS-ESI spectrum of **1**

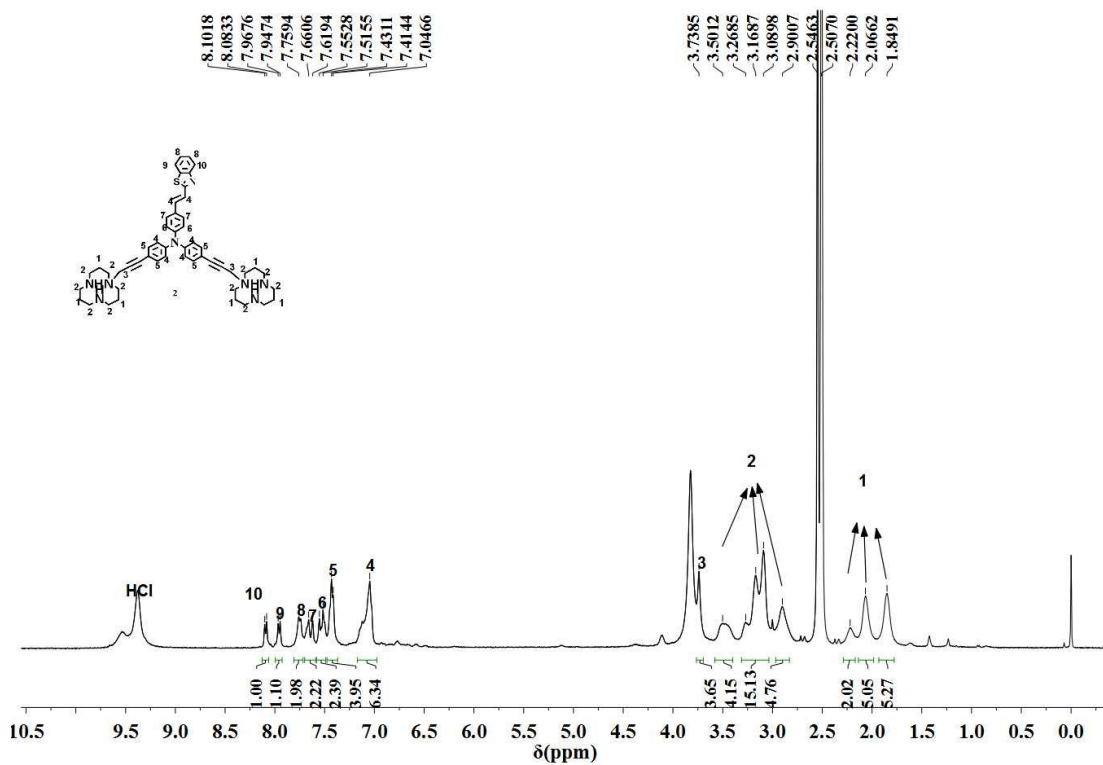

Fig. S26  $^1\text{H NMR}$  (400 MHz,  $\text{DMSO-}d_6$ ) spectrum of 2

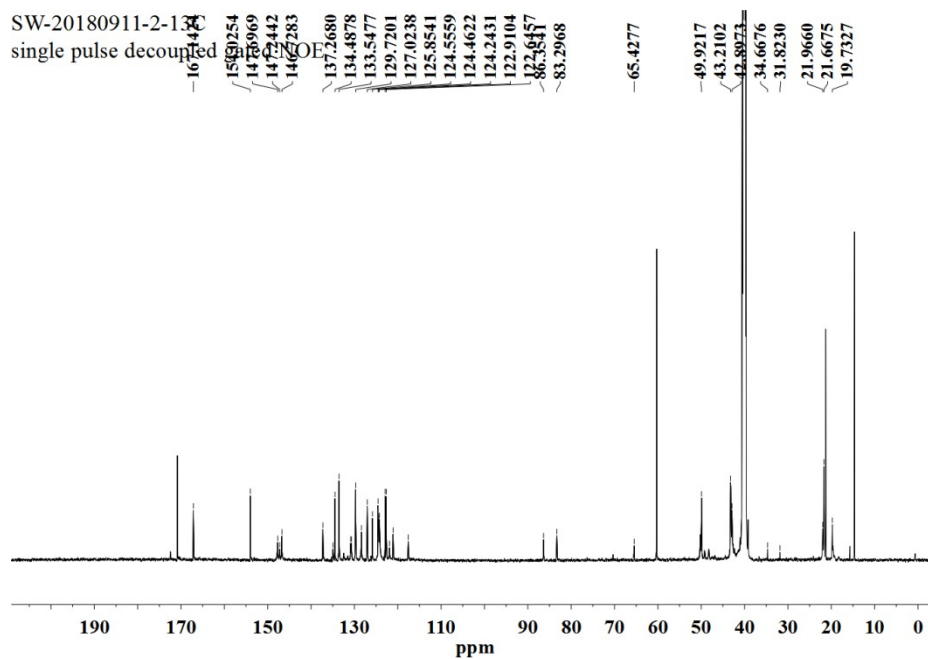

Fig. S27  $^{13}\text{C NMR}$  (126 MHz,  $\text{DMSO-}d_6$ ) spectrum of 2

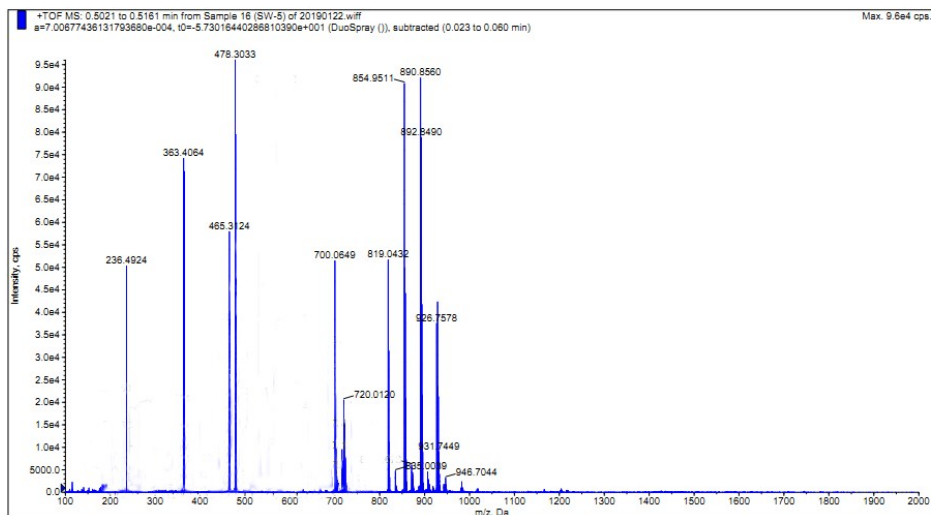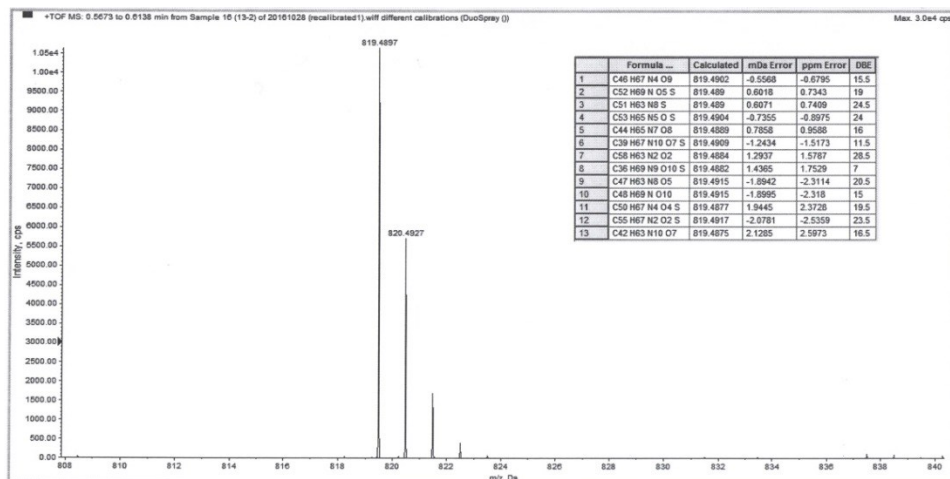

Fig. S28 The HRMS-ESI spectrum of 2

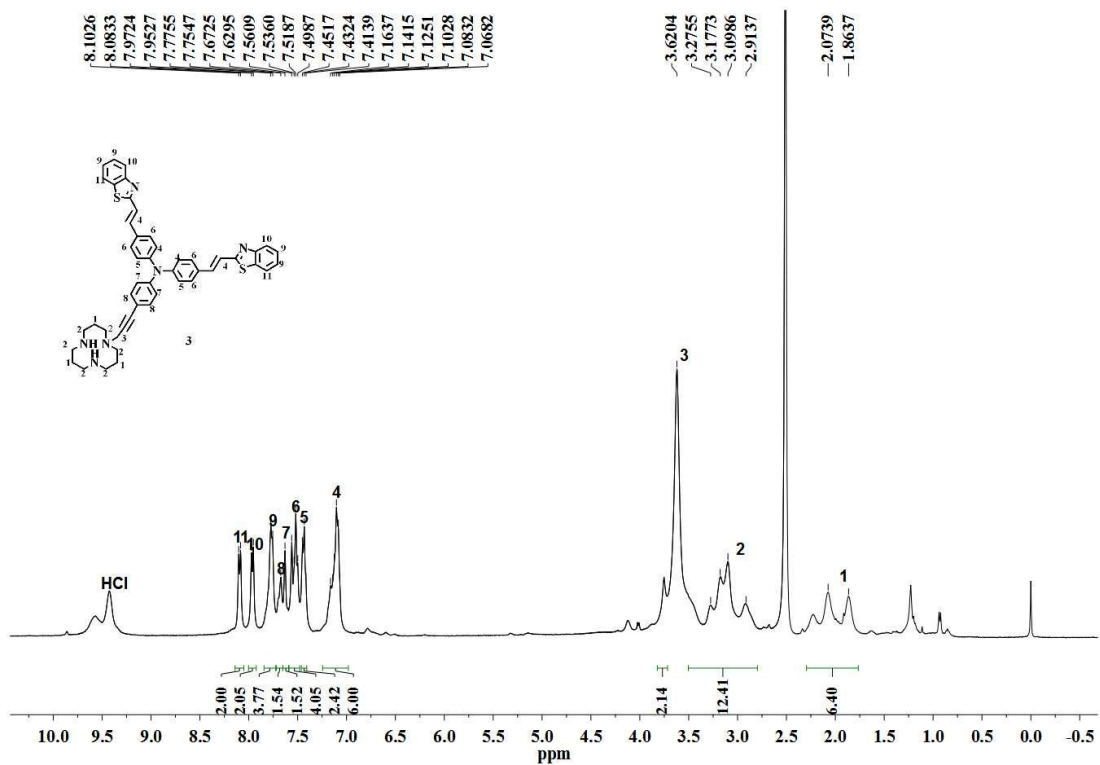

Fig. S29  $^1\text{H}$  NMR (400 MHz,  $\text{DMSO-}d_6$ ) spectrum of 3

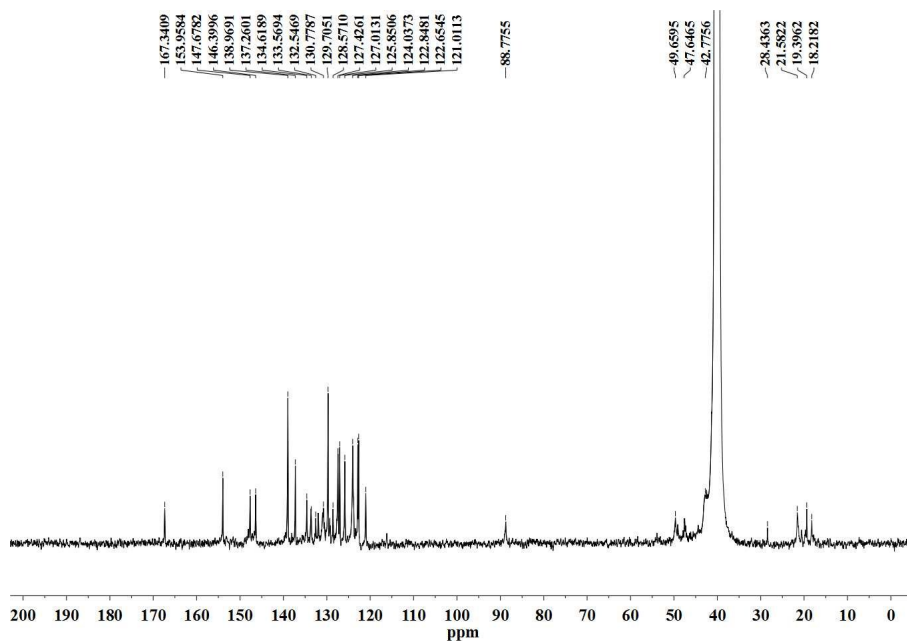

Fig. S30  $^{13}\text{C}$  NMR (126 MHz,  $\text{DMSO-}d_6$ ) spectrum of 3

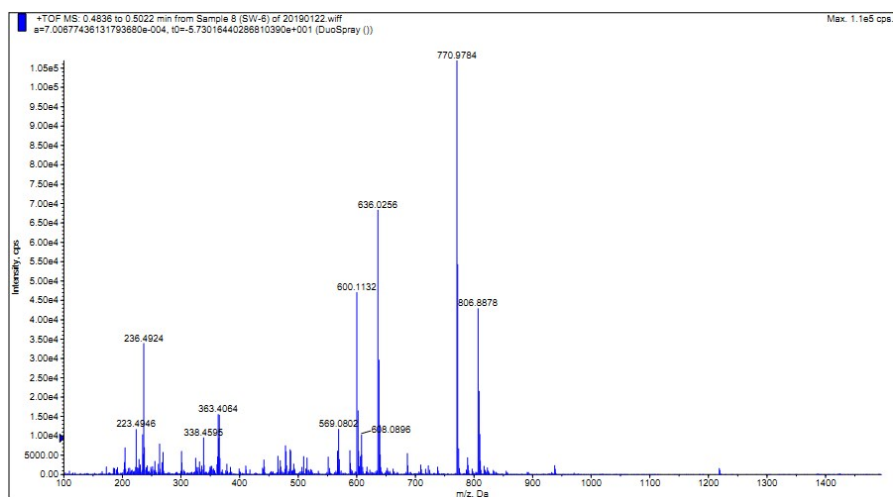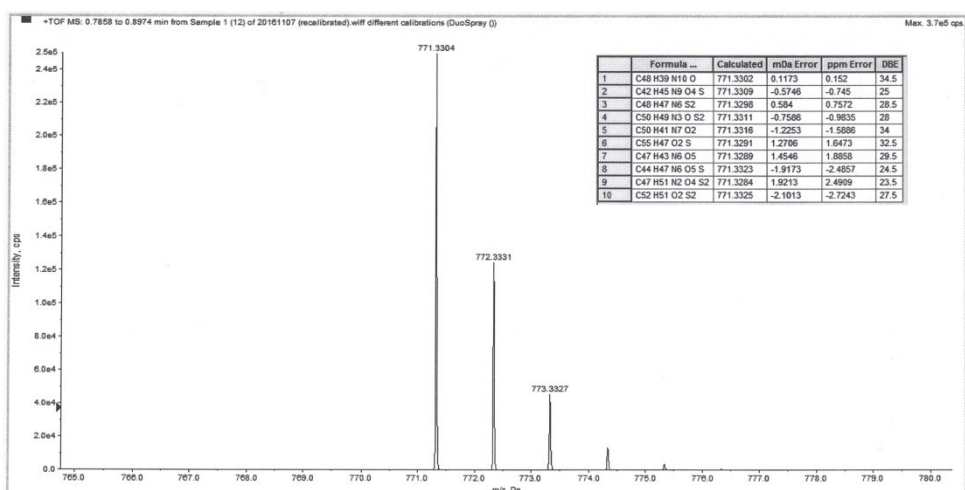

Fig. S31 The MS and HRMS-ESI spectrum of 3

### 13. References

1. Z. F. Guo, H. Yan, Z.-F. Li, Z. L. Lu, *Org. Bio. Chem.*, 2011, **9**, 6788-6796.
